# Supplementary material
Source: publisher figshare collection journal article supplement (https://asha.figshare.com/ndownloader/files/28405200)
Supplement: Supplementary file 1 [file 28405200]

## Supplemental Material S1

*Background span tasks for people with aphasia and neurologically intact people*

| <u>Participant Type</u>      | Digit Span – Pointing<br><i>M (SD)</i> | <u>Task</u><br>Word Span – Pointing<br><i>M (SD)</i> |
|------------------------------|----------------------------------------|------------------------------------------------------|
| People With Aphasia          | 3.54 (1.44)                            | 2.97 (1.04)                                          |
| Neurologically Intact Adults | 6.64 (0.70)                            | 5.76 (1.15)                                          |
